# Supplementary material for: Dietary Change during Pregnancy and Women’s Reasons for Change
Source: MDPI journal article supplement (doi:10.3390/nu10081032), 2018-08-08
Supplement: s1 [file s1]

Study ID: \_\_\_\_\_

**DIETARY CHANGES MADE SINCE BECOMING PREGNANT**

The following questions will ask about any **dietary changes** that you have made **since you have become pregnant**. Please include the **number of times** you consumed the food or drink per week or per day, the **amount** of the item you consumed each time, and a reason or reasons to explain **why** the change was made.

1. **Since you have become pregnant**, have you completely **eliminated** any foods or beverages from your diet that you consumed prior to becoming pregnant?

- NO (GO TO QUESTION 2)
- YES (CONTINUE BELOW WITH 1a)

1a. Please list the food(s) and beverage(s) you completely **eliminated** from your diet, a reason explaining why the change was made, and your consumption of the item(s) **prior** to pregnancy.

| <u>FOOD ITEM</u>   | <u>REASON FOR ELIMINATION OF FOOD</u><br>(i.e. for the health of my baby,<br>had no appetite for the food, etc.) | <u>CONSUMPTION OF ITEM</u><br><b><u>PRIOR TO PREGNANCY</u></b><br>(portion; number of times per week<br>or per day (please specify)) |                  |
|--------------------|------------------------------------------------------------------------------------------------------------------|--------------------------------------------------------------------------------------------------------------------------------------|------------------|
|                    |                                                                                                                  | <b>Amount</b>                                                                                                                        | <b>Frequency</b> |
| <i>i.e.</i> Coffee | Smell made me nauseous                                                                                           | 1 cup                                                                                                                                | 2 times /day     |
| _____              | _____                                                                                                            | _____                                                                                                                                | _____            |
| _____              | _____                                                                                                            | _____                                                                                                                                | _____            |
| _____              | _____                                                                                                            | _____                                                                                                                                | _____            |
| _____              | _____                                                                                                            | _____                                                                                                                                | _____            |

2. **Since you have become pregnant**, have you **decreased** your consumption of **any** specific foods or beverages?

- NO (GO TO QUESTION 3)
- YES (CONTINUE BELOW WITH 2a)

2a. Please list which food(s) and beverage(s) you **decreased** your consumption of. Note the amount and frequency of the food consumed prior to pregnancy and since learning that you were pregnant. Also, provide a brief explanation why the change was made.

| <u>FOOD ITEM</u> | <u>CONSUMPTION PRIOR TO PREGNANCY</u><br>(Amount and Frequency per week or per day) |                     | <u>CONSUMPTION SINCE LEARNING OF PREGNANCY</u> |                     | <u>REASON FOR DECREASE IN CONSUMPTION</u> |
|------------------|-------------------------------------------------------------------------------------|---------------------|------------------------------------------------|---------------------|-------------------------------------------|
|                  | Amount                                                                              | Frequency           | Amount                                         | Frequency           |                                           |
| <u>i.e. Tea</u>  | <u>1 cup</u>                                                                        | <u>5 times/week</u> | <u>1 cup</u>                                   | <u>2 times/week</u> | <u>Drank more milk instead of tea</u>     |
| <u>_____</u>     | <u>_____</u>                                                                        | <u>_____</u>        | <u>_____</u>                                   | <u>_____</u>        | <u>_____</u>                              |
| <u>_____</u>     | <u>_____</u>                                                                        | <u>_____</u>        | <u>_____</u>                                   | <u>_____</u>        | <u>_____</u>                              |
| <u>_____</u>     | <u>_____</u>                                                                        | <u>_____</u>        | <u>_____</u>                                   | <u>_____</u>        | <u>_____</u>                              |
| <u>_____</u>     | <u>_____</u>                                                                        | <u>_____</u>        | <u>_____</u>                                   | <u>_____</u>        | <u>_____</u>                              |

3. **Since you have become pregnant**, have you **introduced** any **brand new** foods or beverages in your diet that you never consumed prior to becoming pregnant?

- NO (GO TO QUESTION 4)
- YES (CONTINUE BELOW WITH 3a)

3a. Please list the **brand new** food(s) and beverage(s) you **introduced** into your diet, a reason explaining why the change was made, and your consumption of the item(s) since becoming pregnant.

| <u>FOOD ITEM</u>      | <u>REASON FOR INTRODUCTION OF FOOD</u>  | <u>CONSUMPTION OF ITEM SINCE PREGNANCY</u> |           |
|-----------------------|-----------------------------------------|--------------------------------------------|-----------|
|                       |                                         | Amount                                     | Frequency |
| <u>i.e. Ice cream</u> | <u>Continuous craving for ice cream</u> | <u>1 cup; 5 times/week</u>                 |           |
| <u>_____</u>          | <u>_____</u>                            | <u>_____</u>                               |           |
| <u>_____</u>          | <u>_____</u>                            | <u>_____</u>                               |           |
| <u>_____</u>          | <u>_____</u>                            | <u>_____</u>                               |           |
| <u>_____</u>          | <u>_____</u>                            | <u>_____</u>                               |           |

4. **Since you have become pregnant**, have you **increased** your consumption of **any** specific foods or beverages?

- NO (GO TO QUESTION 5)
- YES (CONTINUE BELOW WITH 4a)

4a. Please list which food(s) and beverage(s) you **increased** your consumption of. Note the amount and frequency of the food consumed prior to pregnancy and since learning that you were pregnant. Also, provide a brief explanation why the change was made.

| <u>FOOD ITEM</u>    | <u>CONSUMPTION BEFORE PREGNANCY</u><br>(Amount and Frequency per week or per day) |                  | <u>CONSUMPTION SINCE LEARNING OF PREGNANCY</u> |                  | <u>REASON FOR INCREASE IN CONSUMPTION</u> |
|---------------------|-----------------------------------------------------------------------------------|------------------|------------------------------------------------|------------------|-------------------------------------------|
|                     | <b>Amount</b>                                                                     | <b>Frequency</b> | <b>Amount</b>                                  | <b>Frequency</b> |                                           |
| <b>i.e.</b> Pickles | 1 pickle                                                                          | 3 times/week     | 3 pickles                                      | 6 times/week     | Craved salt and enjoyed the crunch        |
| _____               | _____                                                                             | _____            | _____                                          | _____            | _____                                     |
| _____               | _____                                                                             | _____            | _____                                          | _____            | _____                                     |
| _____               | _____                                                                             | _____            | _____                                          | _____            | _____                                     |
| _____               | _____                                                                             | _____            | _____                                          | _____            | _____                                     |

5. In the space below, please make any other comments regarding **changes in dietary intake since becoming pregnant** (i.e. Did you combine certain foods that you would not have normally combined? Where there specific times throughout the day when you craved certain foods? Etc.)

---



---



---



---



---
